# Supplementary material for: Hypoxylon pulicicidum sp. nov. (Ascomycota, Xylariales), a Pantropical Insecticide-Producing Endophyte
Source: PubMed Central journal article supplement (PMC3467290; doi:10.1371/journal.pone.0046687), 2012-10-09

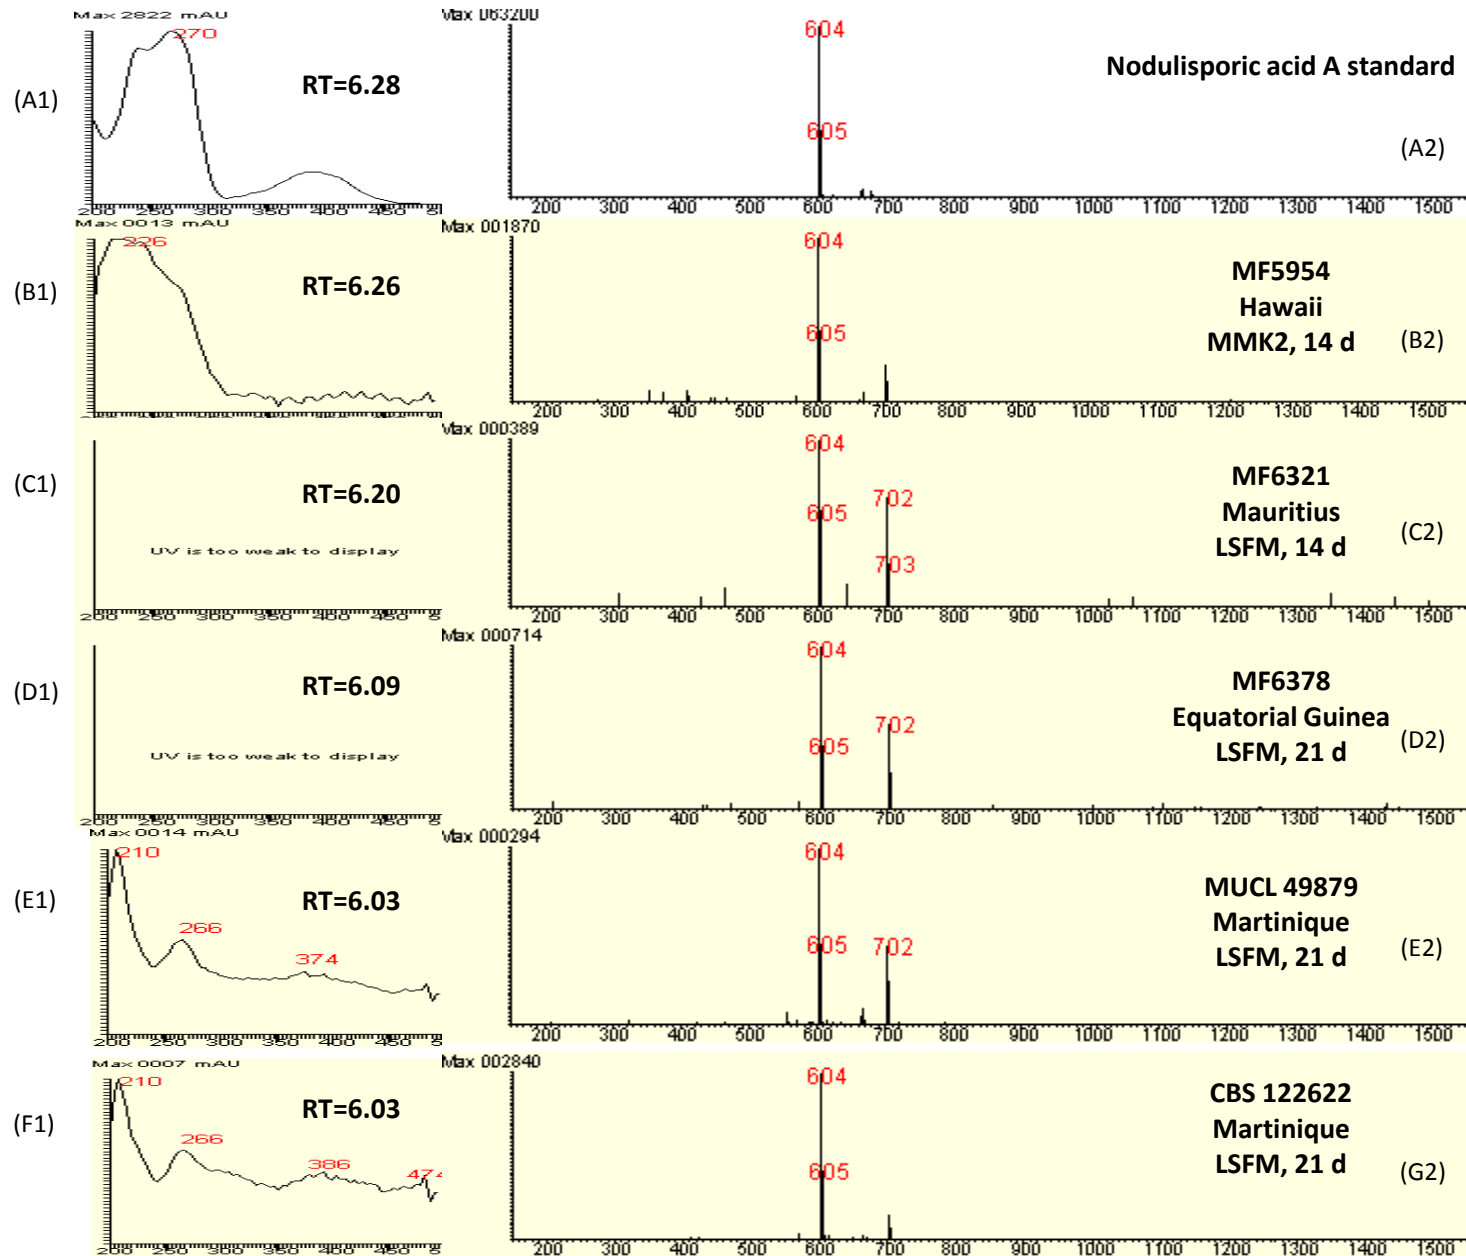

Supplement: pone.0046687.s002.pdf [file pone.0046687.s002.pdf]
