# Supplementary material for: Hypoxylon pulicicidum sp. nov. (Ascomycota, Xylariales), a Pantropical Insecticide-Producing Endophyte
Source: PubMed Central journal article supplement (PMC3467290; doi:10.1371/journal.pone.0046687), 2012-10-09

*Hypoxylon pulvicicidum* MUCL 49879

Conidia after 48 hr on Cornmeal Dextrose agar

Conidia don't germinate

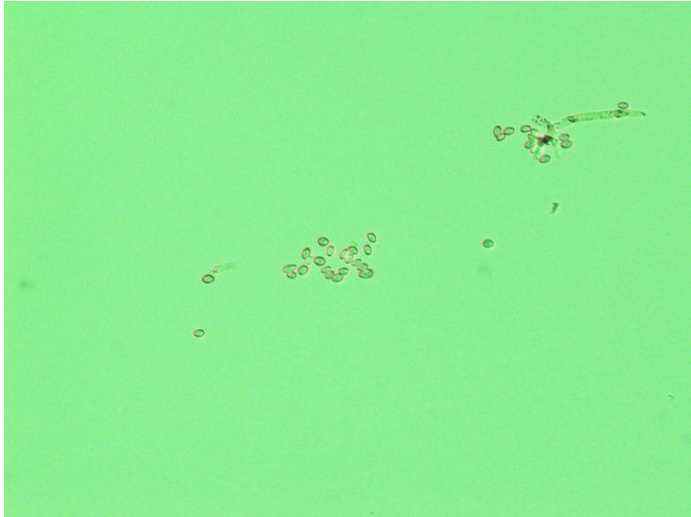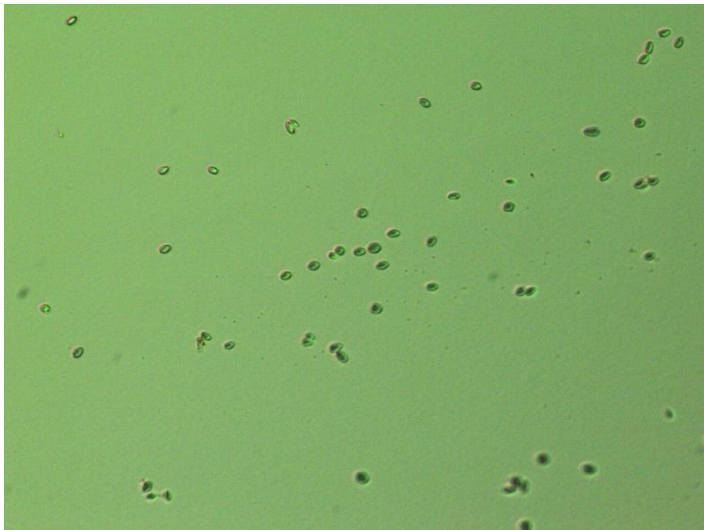

Conidiophores and hyphal fragments germinate

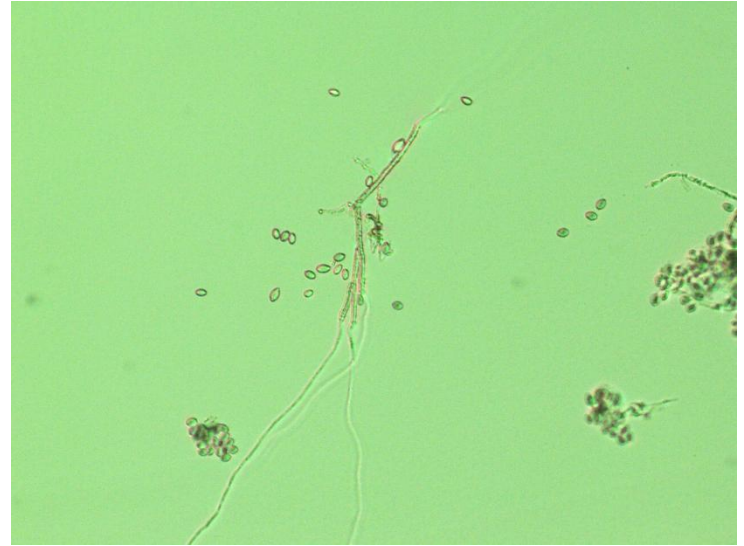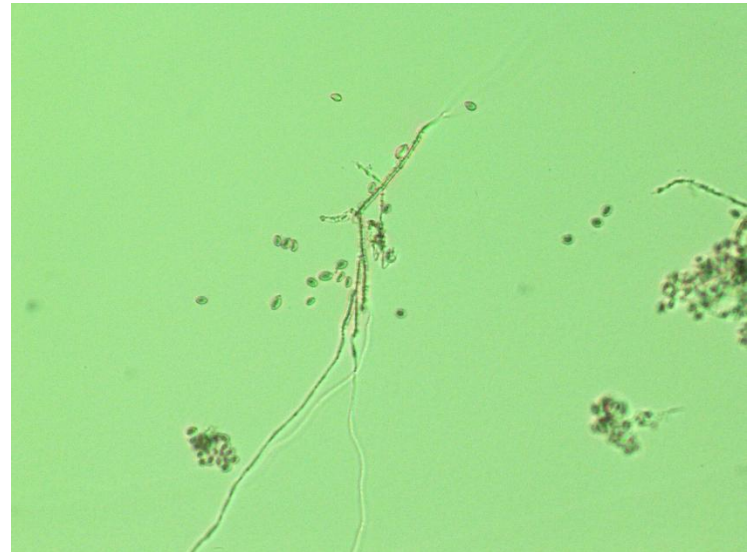

# *Hypoxylon pulvicicidum* MF 5954

Conidia after 48 hr on cornmeal dextrose agar

Conidia only form germ tube

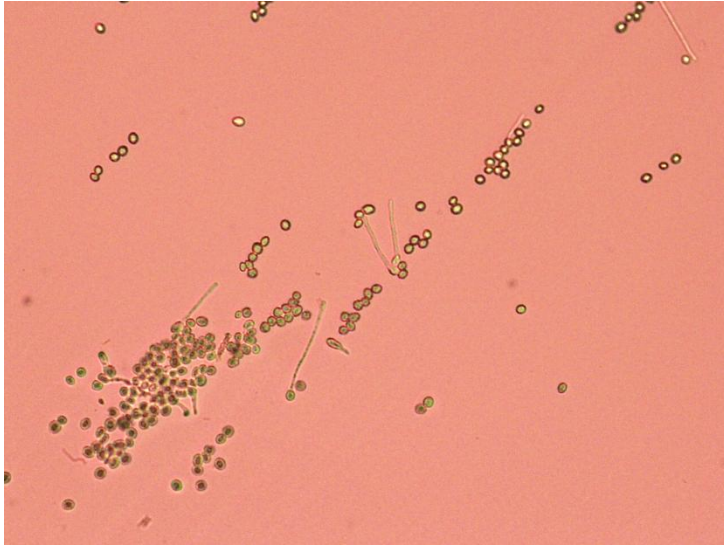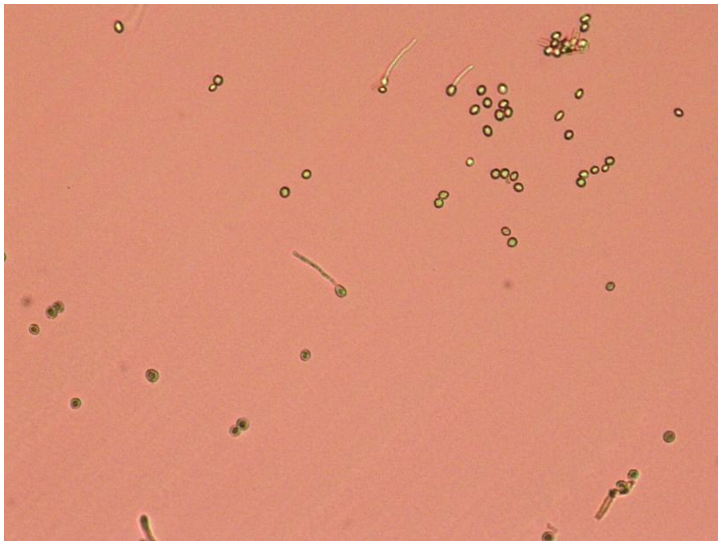

Conidiophores and hyphal fragments germinate

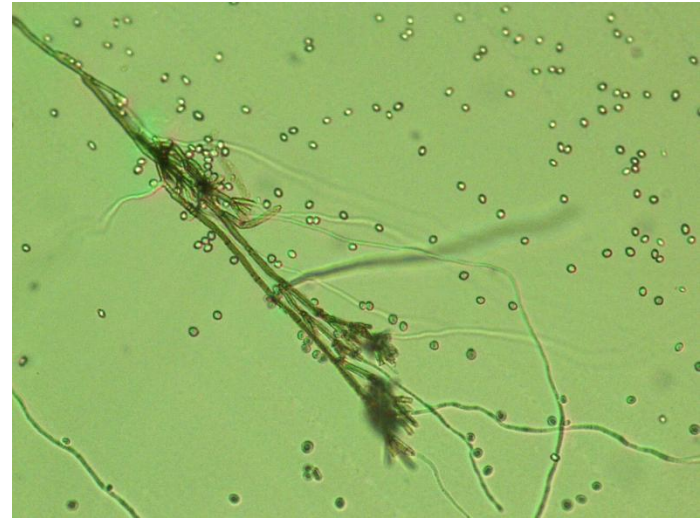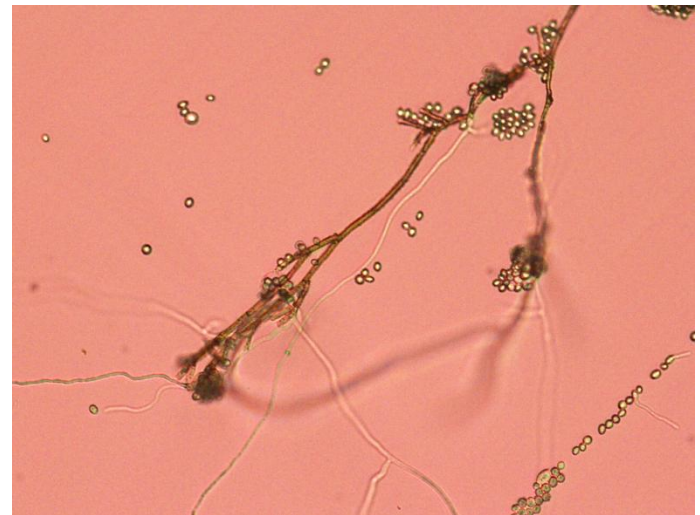

Supplement: pone.0046687.s003.pdf [file pone.0046687.s003.pdf]
